# Supplementary material for: Quality Assessment of Ground Coffee Samples from Greek Market Using Various Instrumental Analytical Methods, In Silico Studies and Chemometrics
Source: MDPI journal article supplement (doi:10.3390/antiox12061184), 2023-05-30
Supplement: s1 [file s1]

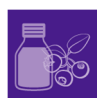**Table S1.** Mean contents of elucidated metabolites in coffee samples, expressed as normalized mean mass intensities.

| Metabolite                                     | Coffees 101-125*         | Coffees 201-211*         | Coffees 301-306*           | Coffees 401-406*           | Coffees 501-509*           |
|------------------------------------------------|--------------------------|--------------------------|----------------------------|----------------------------|----------------------------|
| Benzoic acid                                   | 0.68(±0.28) <sup>a</sup> | 0.60(±0.16) <sup>a</sup> | 0.505(±0.062) <sup>a</sup> | 0.581(±0.18) <sup>a</sup>  | 0.573(±0.076) <sup>a</sup> |
| Coumaric acid                                  | 0.46(±0.25) <sup>a</sup> | 0.39(±0.31) <sup>a</sup> | 0.50(±0.16) <sup>a</sup>   | 0.280(±0.043) <sup>a</sup> | 0.26(±0.15) <sup>a</sup>   |
| Caffeic acid                                   | 1.89(±0.48) <sup>a</sup> | 1.73(±0.49) <sup>a</sup> | 1.38(±0.63) <sup>a</sup>   | 1.485(±0.32) <sup>a</sup>  | 1.89(±0.73) <sup>a</sup>   |
| Chlorogenic acid                               | 10.2(±6.0) <sup>a</sup>  | 4.1(±1.3) <sup>b</sup>   | 2.56(±0.84) <sup>b</sup>   | 8.0(±3.2) <sup>ab</sup>    | 7.0(±3.0) <sup>ab</sup>    |
| Quinic acid                                    | 40(±20) <sup>a</sup>     | 48(±14) <sup>a</sup>     | 42.4(±2.7) <sup>a</sup>    | 44.0(±8.0) <sup>a</sup>    | 41(±12) <sup>a</sup>       |
| Caffeoyl-quinolactone                          | 2.3(±2.0) <sup>a</sup>   | 3.1(±2.5) <sup>a</sup>   | 3.2(±2.8) <sup>a</sup>     | 0.97(±0.40) <sup>a</sup>   | 2.2(±2.0) <sup>a</sup>     |
| p-Coumaroyl quinic acid                        | 0.40(±0.56) <sup>a</sup> | 1.0(±2.2) <sup>a</sup>   | 0.52(±0.35) <sup>a</sup>   | 0.39(±0.45) <sup>a</sup>   | 0.49(±0.43) <sup>a</sup>   |
| Feruloyl-quinolactone                          | 14.5(±9.0) <sup>a</sup>  | 11.6(±6.3) <sup>a</sup>  | 3.9(±2.5) <sup>a</sup>     | 17(±12) <sup>a</sup>       | 17(±10) <sup>a</sup>       |
| Dicaffeoyl quinic acid                         | 5.2(±7.8) <sup>a</sup>   | 2.9(±1.7) <sup>a</sup>   | 4.6(±5.4) <sup>a</sup>     | 5.3(±4.2) <sup>a</sup>     | 4.8(±6.1) <sup>a</sup>     |
| Caffeoyl-feruloylquinic acid                   | 3.9(±2.6) <sup>a</sup>   | 2.0(±1.5) <sup>a</sup>   | 1.43(±0.96) <sup>a</sup>   | 3.4(±2.5) <sup>a</sup>     | 3.2(±1.3) <sup>a</sup>     |
| Dihydroxy-kaurenoic acid                       | 3.4(±3.8) <sup>a</sup>   | 0                        | 0                          | 4.4(±6.6) <sup>a</sup>     | 0.27(±0.59) <sup>a</sup>   |
| Atracyligenin-O-hexoside                       | 47(±27) <sup>a</sup>     | 27(±19) <sup>ab</sup>    | 17(±15) <sup>b</sup>       | 21(±13) <sup>ab</sup>      | 26(±15) <sup>ab</sup>      |
| Isovaleryl-atracyligenin-O-hexoside derivative | 10.0(±6.3) <sup>a</sup>  | 9.1(±5.3) <sup>a</sup>   | 3.55(±0.97) <sup>a</sup>   | 5.0(±2.9) <sup>a</sup>     | 5.2(±2.9) <sup>a</sup>     |
| Cafestol                                       | 1.1(±1.0) <sup>a</sup>   | 0.70(±0.82) <sup>a</sup> | 0.161(±0.027) <sup>a</sup> | 0.143(±0.025) <sup>a</sup> | 0.92(±0.97) <sup>a</sup>   |
| Kahweol                                        | 1.9(±1.2) <sup>a</sup>   | 1.81(±0.94) <sup>a</sup> | 1.28(±0.76) <sup>a</sup>   | 1.00(±0.74) <sup>a</sup>   | 1.03(±0.68) <sup>a</sup>   |
| Trihydroxy-octadecaenoic acid                  | 10.2(±9.3) <sup>a</sup>  | 6.1(±6.7) <sup>a</sup>   | 3.6(±3.1) <sup>a</sup>     | 2.8(±1.7) <sup>a</sup>     | 8.6(±6.6) <sup>a</sup>     |
| Linoleic acid methyl ester                     | 0.40(±0.28) <sup>a</sup> | 0.62(±0.53) <sup>a</sup> | 0.63(±0.59) <sup>a</sup>   | 0.18(±0.16) <sup>a</sup>   | 0.41(±0.19) <sup>a</sup>   |
| Caffeoyl-N-tryptophan                          | 0.78(±0.89) <sup>a</sup> | 1.17(±0.74) <sup>a</sup> | 0.8(±1.8) <sup>a</sup>     | 0.91(±1.8) <sup>a</sup>    | 0.43(±0.62) <sup>a</sup>   |

---

\* The results were expressed as Average( $\pm$ standard deviation); <sup>a-b</sup> Different letters in the same row indicate statistically different values ( $P < 0.05$ ).

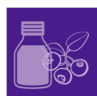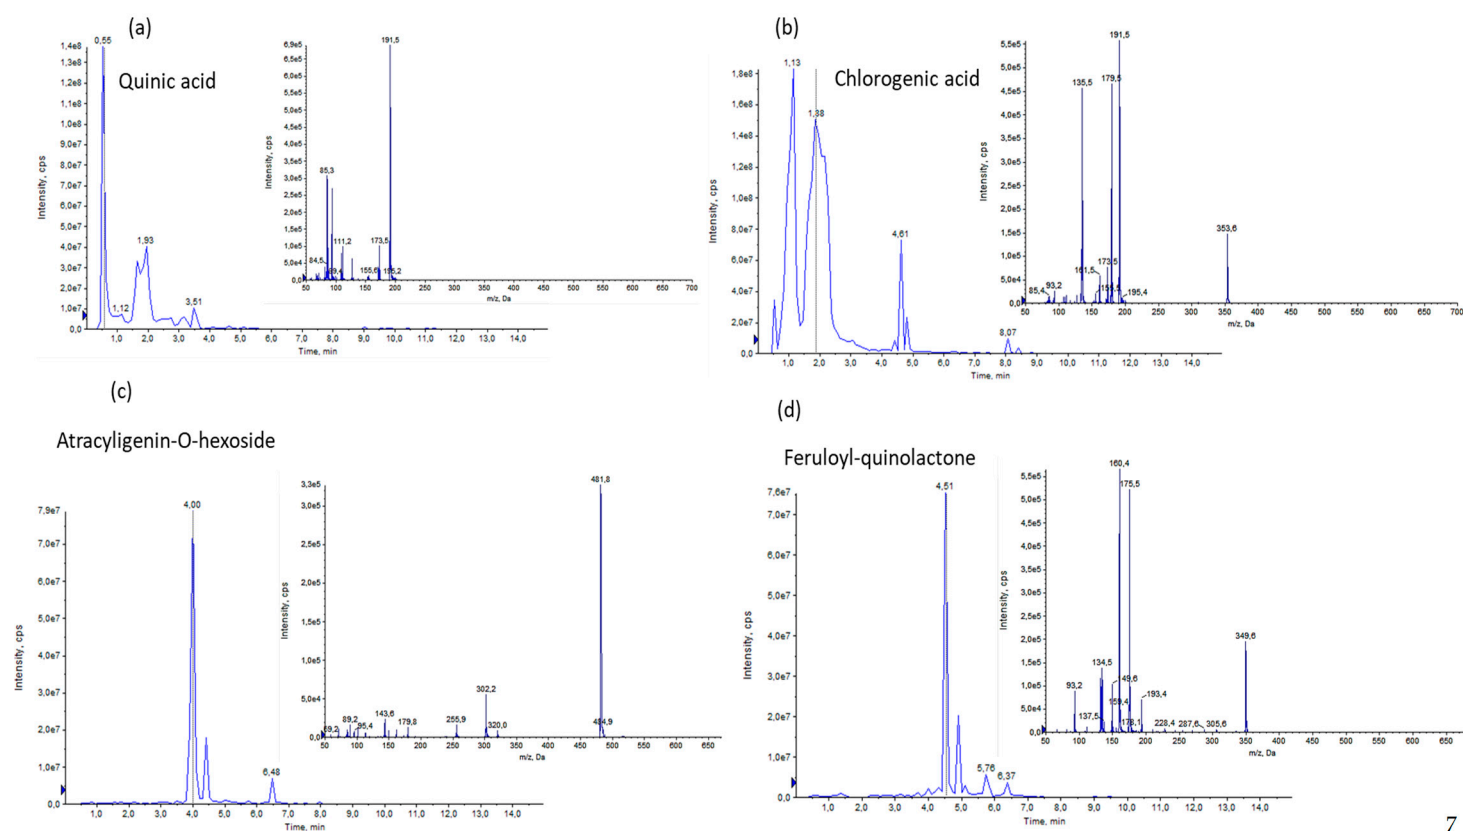

**Figure S1.** Chromatographs and mass spectra of selected metabolites (a) quinic acid; (b) chlorogenic acid, (c) atracylgenin-O-hexoside, (d) feruloyl-quinolactone.
